# Supplementary material for: Double-Blind Placebo-Controlled Study of Memantine in Trichotillomania and Skin-Picking Disorder
Source: Atypon-hosted journal article supplement (doi:10.1176/appi.ajp.20220737), 2023-02-22
Supplement: appi.ajp.20220737.ds001.pdf [file appi.ajp.20220737.ds001.pdf]

**TABLE S1.** Risk of bias domains and steps taken to avoid bias

| Domain                                                   | Steps taken to minimize bias                                                                                                                                                                                                                                                                              |
|----------------------------------------------------------|-----------------------------------------------------------------------------------------------------------------------------------------------------------------------------------------------------------------------------------------------------------------------------------------------------------|
| Selection bias, random sequence generation               | Participants were randomized to treatment arm by an independent pharmacy using an appropriate random sequence generation; the study team and participants were not aware of randomization condition and remained blind to it for the duration of the study                                                |
| Selection bias, allocation concealment                   | Allocation was conducted by an independent pharmacy; the study team and participants were not aware of allocation and remained blind to it for the duration of the study.                                                                                                                                 |
| Performance bias, blinding of participants and personnel | Medication and placebo were of identical appearance and neither study participants nor study personnel were aware of the nature of the treatment (i.e. double-blind design). Active and placebo treatments were administered using identical procedures.                                                  |
| Blinding of outcome assessment                           | Outcome assessors were blinded to treatment condition. Analysis at the end of the study was conducted by an independent statistical company separate to the study team using pre-specified approaches. The statistical analysis plan was agreed in advance of database lock and in advance of unblinding. |
| Attrition bias, incomplete outcome data                  | Attrition was extremely similar across treatment arms. All available outcome data were analyzed.                                                                                                                                                                                                          |
| Reporting bias, selective reporting                      | Instruments and outcome measures were finalized prior to database lock and analysis.                                                                                                                                                                                                                      |
| Other bias                                               | This study did not involve any industry funding.                                                                                                                                                                                                                                                          |

**TABLE S2.** Adjusted means, standard error, and 95% CI for the adjusted means

|                        |                 | Placebo |      |        |       | Memantine |      |        |       |
|------------------------|-----------------|---------|------|--------|-------|-----------|------|--------|-------|
|                        |                 | Mean    | SE   | 95% CI |       | Mean      | SE   | 95% CI |       |
|                        |                 |         |      | Lower  | Upper |           |      | Lower  | Upper |
| <b>NIMH</b>            | <b>Baseline</b> | 12.21   | 0.54 | 11.14  | 13.28 | 12.67     | 0.49 | 11.70  | 13.64 |
|                        | <b>Week 2</b>   | 10.58   | 0.56 | 9.48   | 11.67 | 7.55      | 0.54 | 6.50   | 8.61  |
|                        | <b>Week 4</b>   | 10.76   | 0.57 | 9.64   | 11.89 | 7.11      | 0.54 | 6.04   | 8.17  |
|                        | <b>Week 6</b>   | 11.08   | 0.59 | 9.92   | 12.24 | 6.08      | 0.54 | 5.01   | 7.15  |
|                        | <b>Week 8</b>   | 11.10   | 0.58 | 9.95   | 12.24 | 5.62      | 0.53 | 4.57   | 6.67  |
| <b>SDS total</b>       | <b>Baseline</b> | 9.37    | 0.97 | 7.46   | 11.27 | 10.38     | 0.89 | 8.63   | 12.13 |
|                        | <b>Week 2</b>   | 7.22    | 1.00 | 5.26   | 9.18  | 6.83      | 0.97 | 4.91   | 8.74  |
|                        | <b>Week 4</b>   | 8.54    | 1.03 | 6.52   | 10.57 | 4.35      | 0.99 | 2.41   | 6.29  |
|                        | <b>Week 6</b>   | 8.65    | 1.07 | 6.54   | 10.75 | 3.24      | 1.00 | 1.28   | 5.20  |
|                        | <b>Week 8</b>   | 7.88    | 1.03 | 5.85   | 9.90  | 4.32      | 0.97 | 2.42   | 6.22  |
| <b>HAM-A</b>           | <b>Baseline</b> | 5.11    | 0.65 | 3.83   | 6.38  | 7.10      | 0.60 | 5.93   | 8.27  |
|                        | <b>Week 2</b>   | 3.74    | 0.66 | 2.44   | 5.03  | 4.24      | 0.64 | 2.98   | 5.50  |
|                        | <b>Week 4</b>   | 3.74    | 0.68 | 2.40   | 5.08  | 3.62      | 0.65 | 2.34   | 4.90  |
|                        | <b>Week 6</b>   | 3.51    | 0.70 | 2.14   | 4.89  | 3.87      | 0.65 | 2.59   | 5.15  |
|                        | <b>Week 8</b>   | 3.85    | 0.69 | 2.49   | 5.20  | 3.35      | 0.64 | 2.09   | 4.60  |
| <b>MGH total score</b> | <b>Baseline</b> | 19.47   | 0.70 | 18.09  | 20.84 | 19.30     | 0.64 | 18.05  | 20.55 |
|                        | <b>Week 2</b>   | 17.29   | 0.72 | 15.87  | 18.70 | 14.46     | 0.70 | 13.08  | 15.84 |
|                        | <b>Week 4</b>   | 17.28   | 0.75 | 15.82  | 18.75 | 12.11     | 0.72 | 10.70  | 13.52 |
|                        | <b>Week 6</b>   | 16.68   | 0.78 | 15.14  | 18.22 | 11.65     | 0.74 | 10.20  | 13.10 |
|                        | <b>Week 8</b>   | 16.41   | 0.76 | 14.92  | 17.90 | 12.37     | 0.72 | 10.95  | 13.78 |
